# Supplementary material for: Nrf2 deficiency aggravates PM2.5-induced cardiomyopathy by enhancing oxidative stress, fibrosis and inflammation via RIPK3-regulated mitochondrial disorder
Source: publisher site journal article supplement (doi:10.18632/aging.102906), 2020-03-17
Supplement: Supplementary file [file aging-v12i6-102906-supplementary-material-SD1.pdf]

SUPPLEMENTARY FIGURE

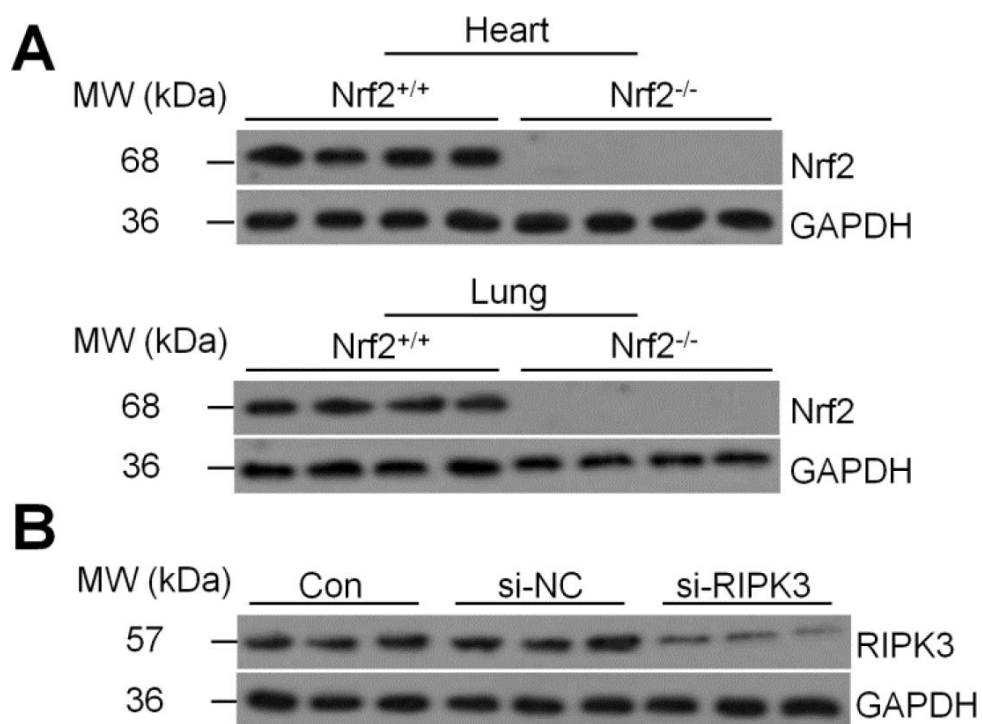

**Supplementary Figure 1.** (A) Western blot analysis of Nrf2 in lung (up panel) and heart (down panel) tissues from the Nrf2<sup>+/+</sup> mice or Nrf2<sup>-/-</sup> mice (n=8/group). (B) Cardiomyocytes were transfected with siRIPK3 or its corresponding negative control siRNA for 24 h. Then, the cells were collected for western blot analysis of RIPK3 (n=6/group).
