# Supplementary material for: Nrf2 deficiency aggravates PM2.5-induced cardiomyopathy by enhancing oxidative stress, fibrosis and inflammation via RIPK3-regulated mitochondrial disorder
Source: publisher site journal article supplement (doi:10.18632/aging.102906), 2020-03-17
Supplement: Supplementary file [file aging-v12i6-102906-supplementary-material-SD2.pdf]

## SUPPLEMENTARY TABLES

Supplementary Table 1. Components of PM<sub>2.5</sub> (ng/m<sup>3</sup>).

| Element    | Ambient PM <sub>2.5</sub> |
|------------|---------------------------|
| Zinc       | 11.19 ± 3.71              |
| Arsenic    | 0.96 ± 0.14               |
| Lanthanum  | 0.02 ± 0.01               |
| Barium     | 3.02 ± 0.68               |
| Antimony   | 0.55 ± 0.24               |
| Molybdenum | 0.45 ± 0.23               |
| Titanium   | 0.83 ± 0.25               |
| Calcium    | 88.46 ± 12.51             |
| Sulfur     | 1021.28 ± 346.71          |
| Phosphorus | 17.21 ± 2.55              |
| Aluminum   | 23.44 ± 7.13              |
| Magnesium  | 26.75 ± 3.96              |
| Sodium     | 55.19 ± 11.47             |
| Lead       | 2.91 ± 0.74               |
| Copper     | 2.45 ± 0.74               |
| Potassium  | 37.23 ± 8.87              |
| Selenium   | 0.46 ± 0.04               |
| Cerium     | 0.04 ± 0.01               |
| Cadmium    | 0.51 ± 0.06               |
| Strontium  | 0.36 ± 0.11               |
| Rubidium   | 0.06 ± 0.01               |
| Nitrogen   | 0.43 ± 0.51               |
| Cobalt     | 0.12 ± 0.11               |
| Iron       | 55.63 ± 13.96             |
| Manganese  | 1.88 ± 0.63               |
| Chromium   | 8.47 ± 1.15               |
| Vanadium   | 0.31 ± 0.19               |

**Supplementary Table 2. Primary and secondary antibodies used for western blot analysis.**

| <b>Name</b>    | <b>Catalog</b> | <b>Dilutions</b> | <b>Vendor</b>             |
|----------------|----------------|------------------|---------------------------|
| TGFβ1          | ab93650        | 1:1000           | Abcam                     |
| Phospho-NF-κB  | ab86299        | 1:1000           | Abcam                     |
| NF-κB          | ab76311        | 1:1000           | Abcam                     |
| IκBα           | #4814          | 1:1000           | Cell Signaling Technology |
| Phospho-IκBα   | #2859          | 1:1000           | Cell Signaling Technology |
| RIPK3          | ab56164        | 1:1000           | Abcam                     |
| HO1            | ab13248        | 1:1000           | Abcam                     |
| Nrf2           | ab31163        | 1:1000           | Abcam                     |
| GCLM           | ab126704       | 1:1000           | Abcam                     |
| α-SMA          | ab32575        | 1:1000           | Abcam                     |
| NDUFB8         | ab110242       | 1:1000           | Abcam                     |
| SDHB           | ab14714        | 1:1000           | Abcam                     |
| UQCRC1         | #459140        | 1:1000           | Invitrogen                |
| MTCO1          | ab14705        | 1:1000           | Abcam                     |
| TIM23          | ab230253       | 1:1000           | Abcam                     |
| Phospho-Smad-2 | #18338         | 1:1000           | Abcam                     |
| Smad-2         | #5339          | 1:1000           | Abcam                     |
| Keap-1         | ab150654       | 1:1000           | Abcam                     |
| Phospho-Smad-3 | #9523          | 1:1000           | Cell Signaling Technology |
| Smad-3         | #9520          | 1:1000           | Cell Signaling Technology |
| Beclin1        | ab210498       | 1:1000           | Abcam                     |
| Vps34          | ab124905       | 1:1000           | Abcam                     |
| LC3B           | ab192890       | 1:1000           | Abcam                     |
| ATG5           | ab108327       | 1:1000           | Abcam                     |
| Rabbit IgG     | ab6721         | 1:4000           | Abcam                     |
| Mouse IgG      | ab6728         | 1:4000           | Abcam                     |
| GAPDH          | ab8245         | 1:1000           | Abcam                     |

**Supplementary Table 3. Primer sequences for RT-qPCR analysis.**

| <b>Gene name</b>              | <b>Primer sequence (5→3')</b>                                                   |
|-------------------------------|---------------------------------------------------------------------------------|
| ANP (Mus musculus)            | Forward primer ACCTGCTAGACCACCTGGAG<br>Reverse primer CCTTGGCTGTTATCTTCGGTACCGG |
| BNP (Mus musculus)            | Forward primer GAGGTCACCTCCTATCCTCTGG<br>Reverse primer GCCATTTCTCCGACTTTTCTC   |
| Col1a1 (Mus musculus)         | Forward primer AGGCTTCAGTGGTTTGGATG<br>Reverse primer CACCAACAGCACCATCGTTA      |
| $\alpha$ -SMA (Mus musculus)  | Forward primer TTCCTTCGTGACTACTGCCG<br>Reverse primer TATAGGTGGTTTCGTGGATGCC    |
| FN (Mus musculus)             | Forward primer CACCCGTGAAGAATGAAG<br>Reverse primer CAGGCAGGAGATTTGTTAG         |
| TGF- $\beta$ 1 (Mus musculus) | Forward primer TGGCCAGATCCTGTCCAAAC<br>Reverse primer CATAGATGGCGTTGTTGCGG      |
| SOD1 (Mus musculus)           | Forward primer GAGACCTGGGCAATGTGACT<br>Reverse primer GTTTACTGCGCAATCCCAAT      |
| SOD2 (Mus musculus)           | Forward primer ATTAACGCGCAGATCATGCA<br>Reverse primer TGTCCCCCACCATTGAACTT      |
| NOX2 (Mus musculus)           | Forward primer TGTGGCTGTGATAAGCAGGA<br>Reverse primer TCCCACTAACATCACCACCT      |
| NOX4 (Mus musculus)           | Forward primer GATTTCTGGACCTTTGTGCCTTT<br>Reverse primer TGATGGTGACAGGTTTGTGCT  |
| TNF- $\alpha$ (Mus musculus)  | Forward primer ACCTGGCCTCTCTACCTTGT<br>Reverse primer CCCGTAGGGCGATTACAGTC      |
| IL-1 $\beta$ (Mus musculus)   | Forward primer GCCACCTTTTGACAGTGATGAG<br>Reverse primer AGTGATACTGCCTGCCTGAAG   |
| RIPK3 (Mus musculus)          | Forward primer ATGTCTAAACTCTCAGCCGTA<br>Reverse primer ATTGAGCCATAACTTGACAGA    |
| Fis1 (Mus musculus)           | Forward primer GTAGGGTTACATGGATGCCAGAGA<br>Reverse primer GGCAAAAGCTCCTCCAGCAG  |
| Drp1 (Mus musculus)           | Forward primer CGGTTCCCTAAACTTCACGA<br>Reverse primer GCACCATTTTCATTTGTCACG     |
| Mid51 (Mus musculus)          | Forward primer AGGATGACAATGGCATTGGC                                             |

|                       |                                         |
|-----------------------|-----------------------------------------|
|                       | Reverse primer CCGATCGTACATCCGCTTAAC    |
| Mid49 (Mus musculus)  | Forward primer GCAACCAATCCACCAACAGAAT   |
|                       | Reverse primer CCGGAAAAGGCGTTAAGTCAC    |
| MFN1 (Mus musculus)   | Forward primer CCATCACTGCGATCTTCGGCCA   |
|                       | Reverse primer CAGCGAGCTTGTTTCTGTAGCCCT |
| MFN2 (Mus musculus)   | Forward primer GGGGCCTACATCCAAGAGAG     |
|                       | Reverse primer GCAGAACTTTGTCCCAGAGC     |
| Opa1 (Mus musculus)   | Forward primer GATGACACGCTCTCCAGTGAAG   |
|                       | Reverse primer CTCGGGGCTAACAGTACAACC    |
| GCK (Mus musculus)    | Forward primer TATGAAGACCGCCAATGT       |
|                       | Reverse primer CCGCCAATGATCTTTTC        |
| PK (Mus musculus)     | Forward primer TTCTGTCTCGCTACCGA        |
|                       | Reverse primer GTCACCACAATCACCAG        |
| HK1 (Mus musculus)    | Forward primer TGCCAAGCTAACTCCAAACC     |
|                       | Reverse primer GATACAGTCCGCTTCGGGTA     |
| G6Pase (Mus musculus) | Forward primer ACTGTGGGCATCAATCTCCTC    |
|                       | Reverse primer CGGGACAGACAGACGTTCCAGC   |
| PEPCK (Mus musculus)  | Forward primer CTGCATAACGGTCTGGACTTC    |
|                       | Reverse primer GCCTTCCACGAACTTCCTCAC    |
| GAPDH (Mus musculus)  | Forward primer GGTGAAGGTCGGTGTGAACG     |
|                       | Reverse primer CCCGTAGGGCGATTACAGTC     |

---
